# Supplementary material for: Enhancement of PD-L1-attenuated CAR-T cell function through breast cancer-associated fibroblasts-derived IL-6 signaling via STAT3/AKT pathways
Source: PubMed Central journal article supplement (PMC10362675; doi:10.1186/s13058-023-01684-7), 2023-07-21
Supplement: 13058_2023_1684_MOESM2_ESM.pdf [file 13058_2023_1684_MOESM2_ESM.pdf]

Western blot gel  
(Full unedited gel)

Fig 2C: Scramble and **IL-6R knock down** MDA-MB-231 cell after treating with CAF-CM to detect PD-L1 expression

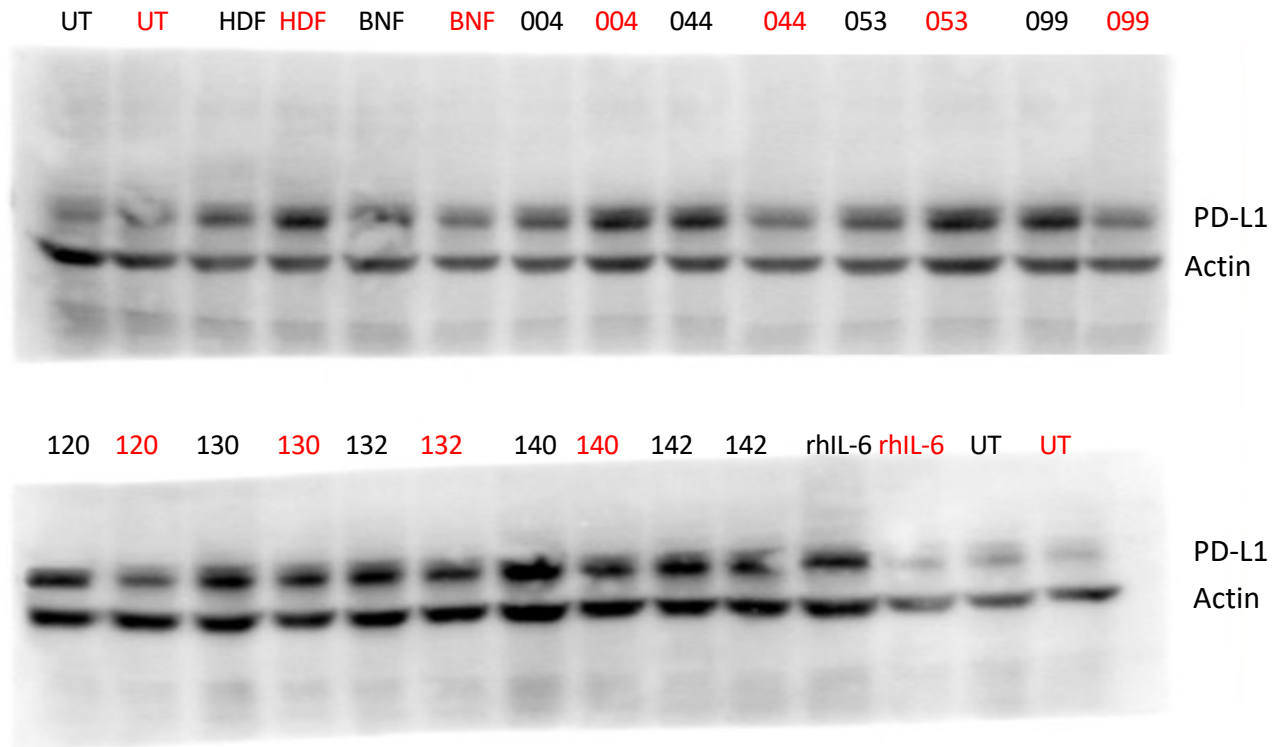

Black font= scramble cell// Red font= IL-6R knock down (KD) cell

# Fig 2D: Scramble and IL-6R knock down HCC70 cell after treating with CAF-CM to detect PD-L1 expression

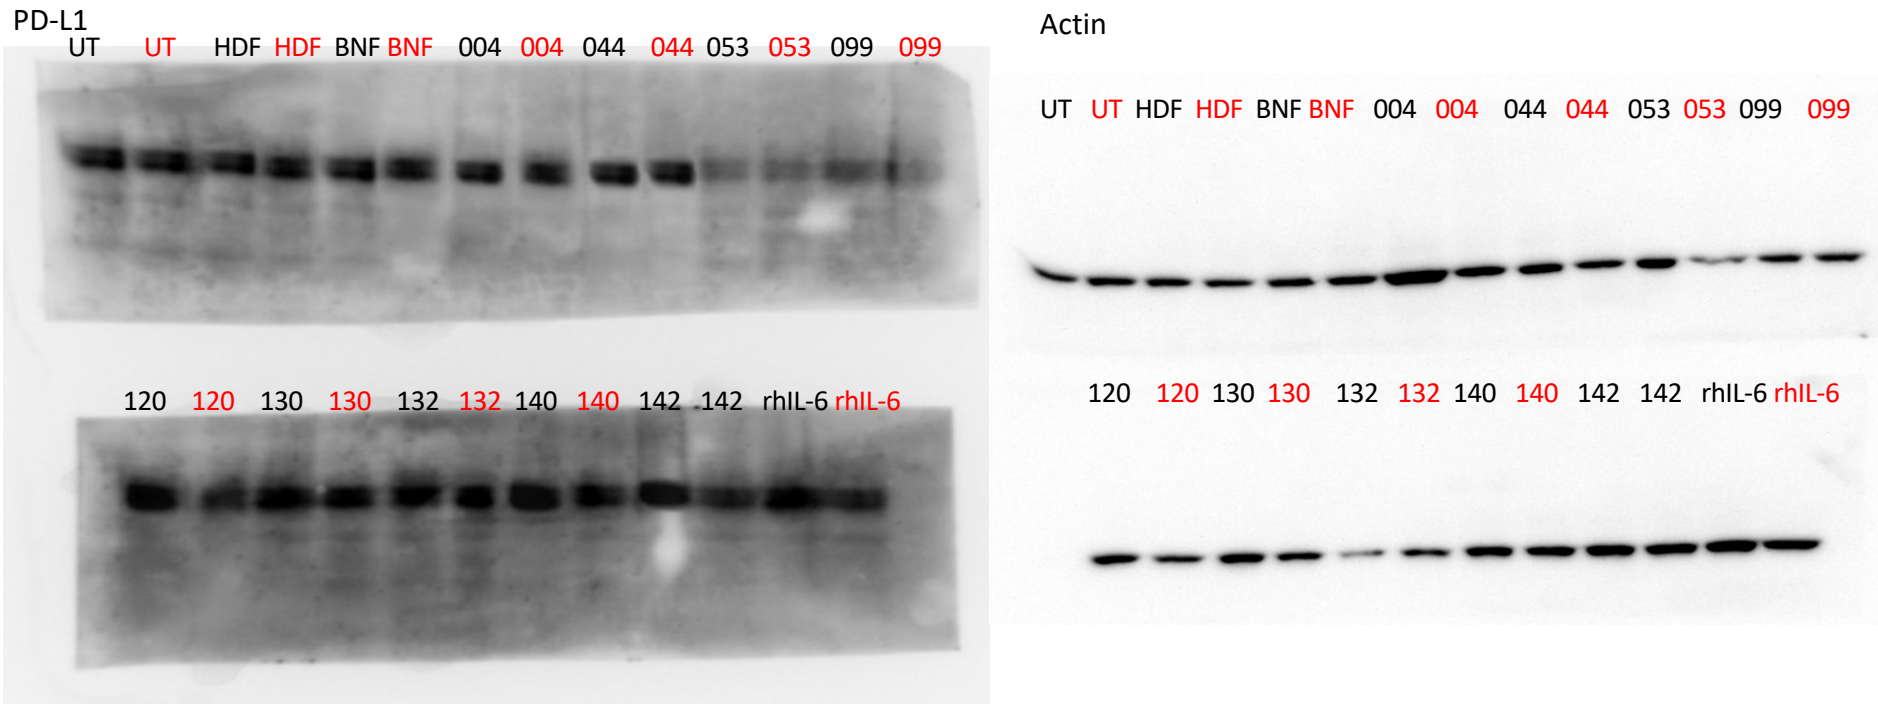

Black font= scramble cell// Red font= IL-6R knock down (KD) cell

# Fig 4A: Scramble and IL-6R knock down MDA-MB-231 cell after treating with CAF-CM to detect signaling molecules

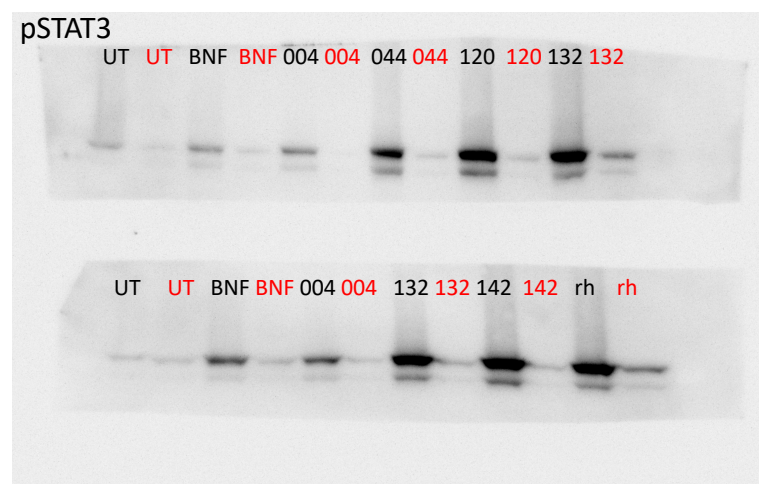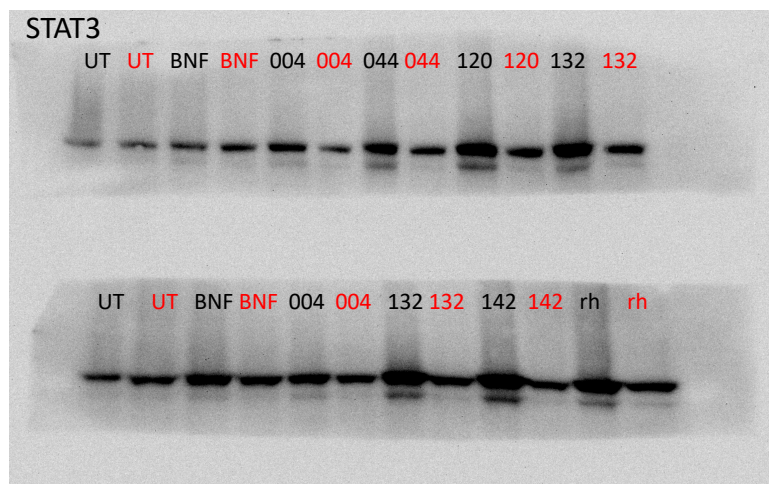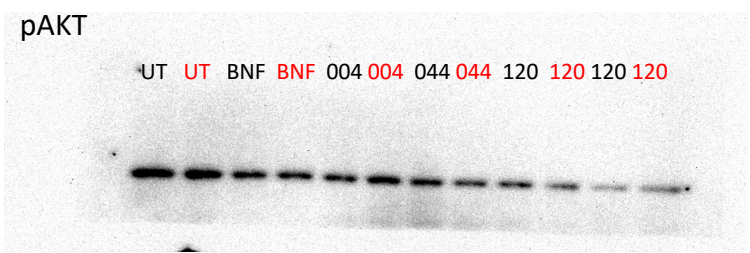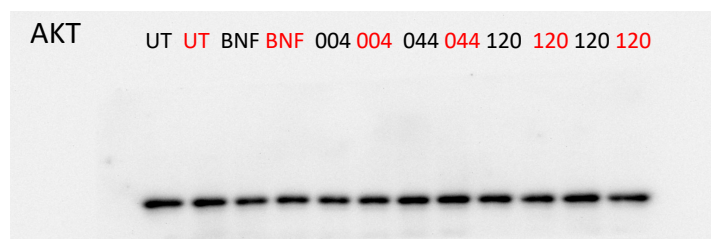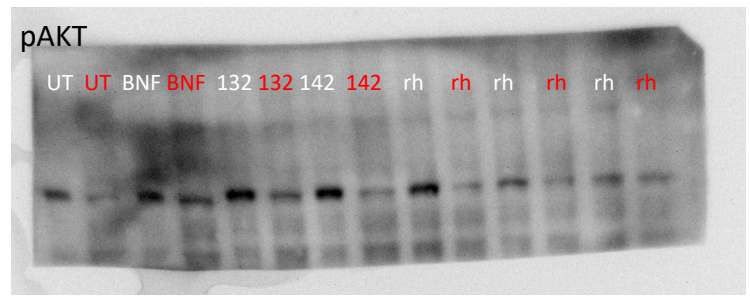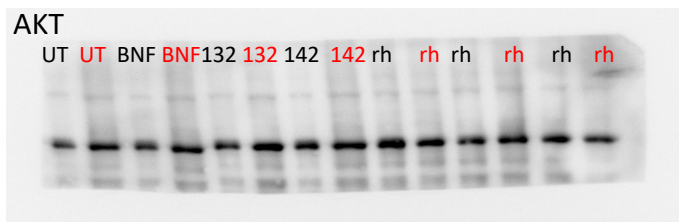

Black font= scramble cell// Red font= IL-6R knock down (KD) cell

# Fig 4A: Scramble and IL-6R knock down MDA-MB-231 cell after treating with CAF-CM to detect signaling molecules

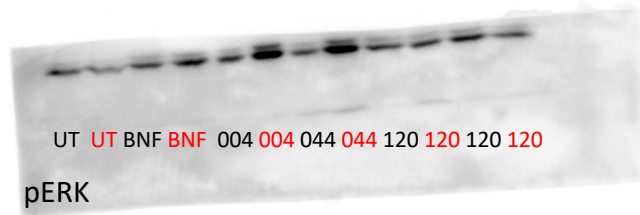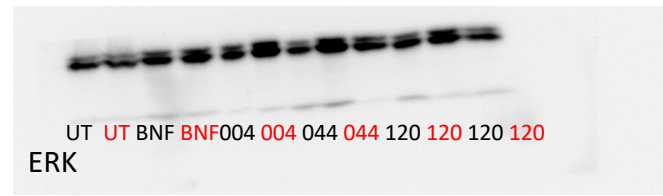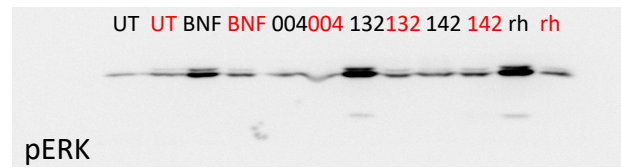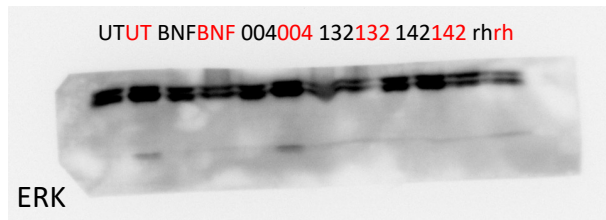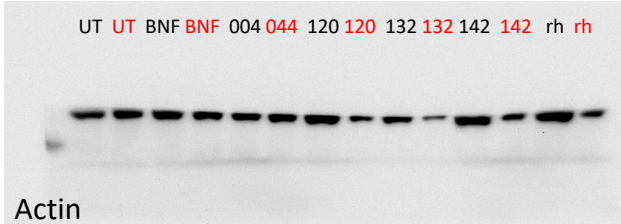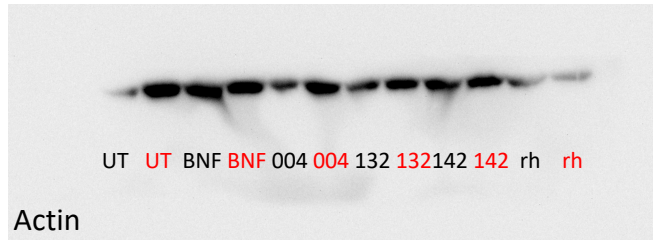

Black font= scramble cell// Red font= IL-6R knock down (KD) cell

# Fig 4B: Scramble and IL-6R knock down HCC70 cell after treating with CAF-CM to detect signaling molecules

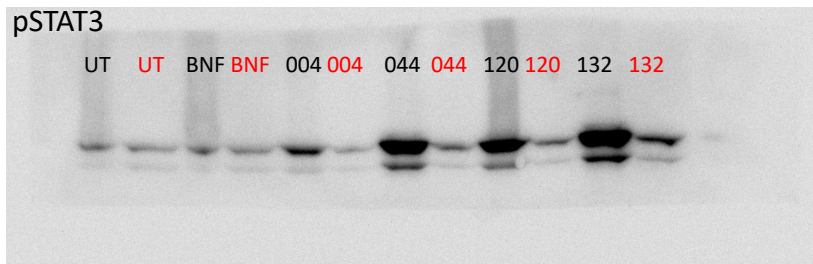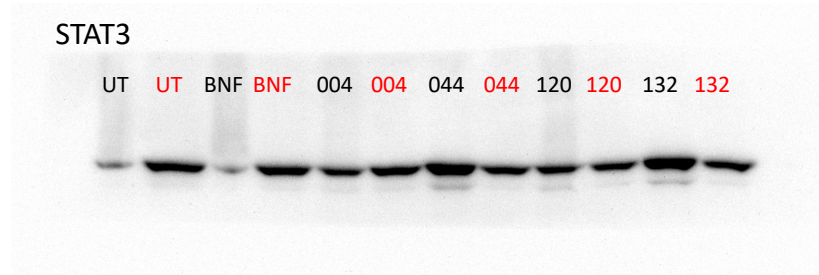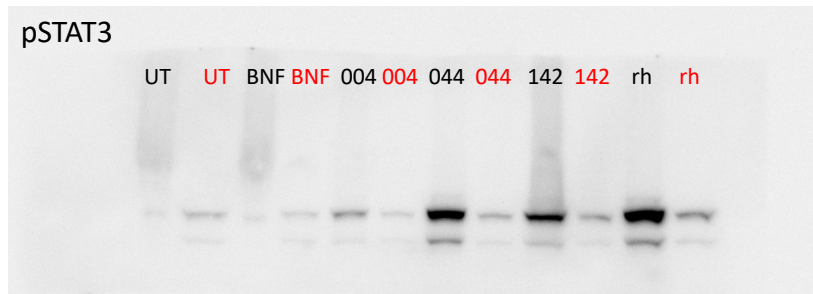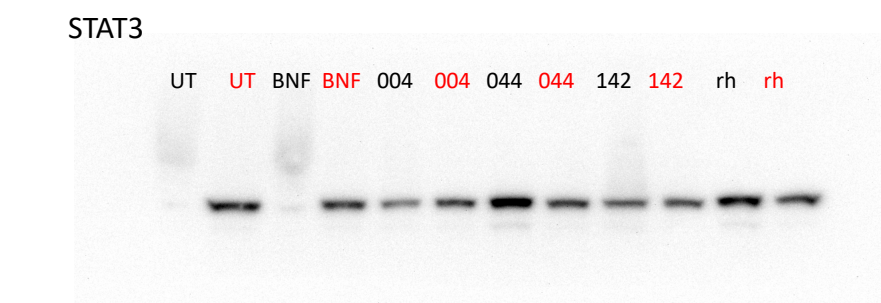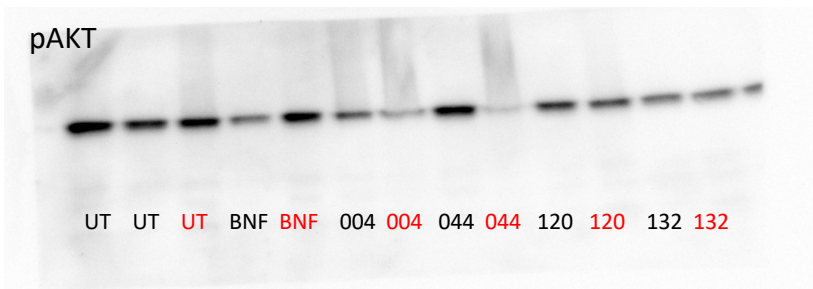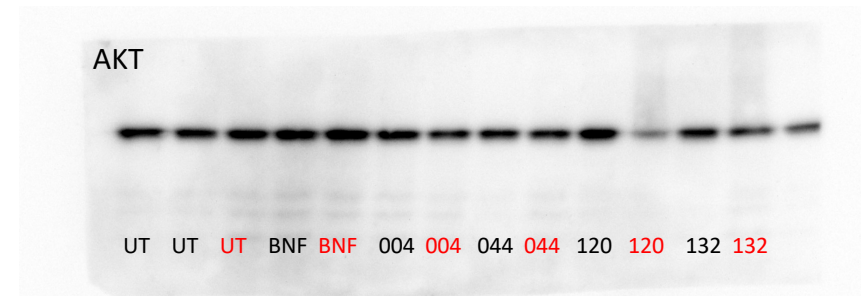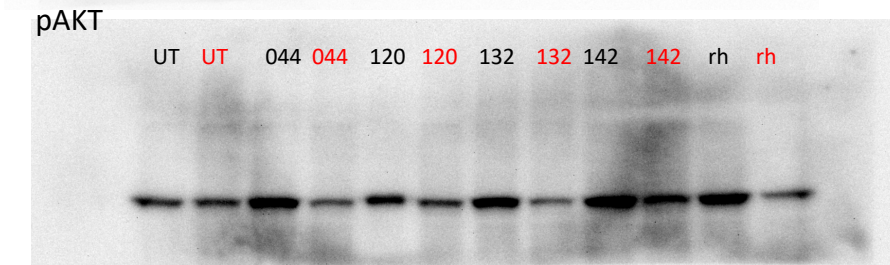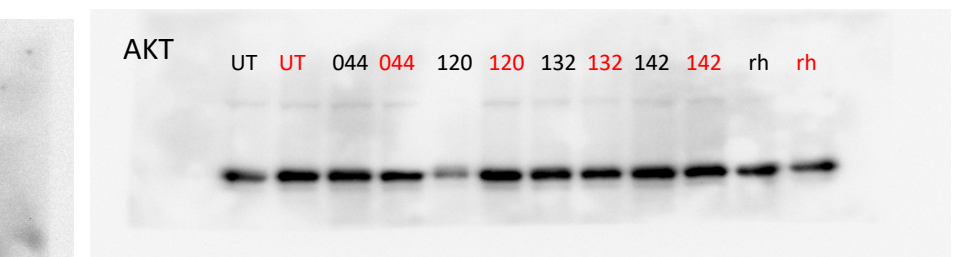

Black font= scramble cell// Red font= IL-6R knock down (KD) cell

# Fig 4B: Scramble and IL-6R knock down HCC70 cell after treating with CAF-CM to detect signaling molecules

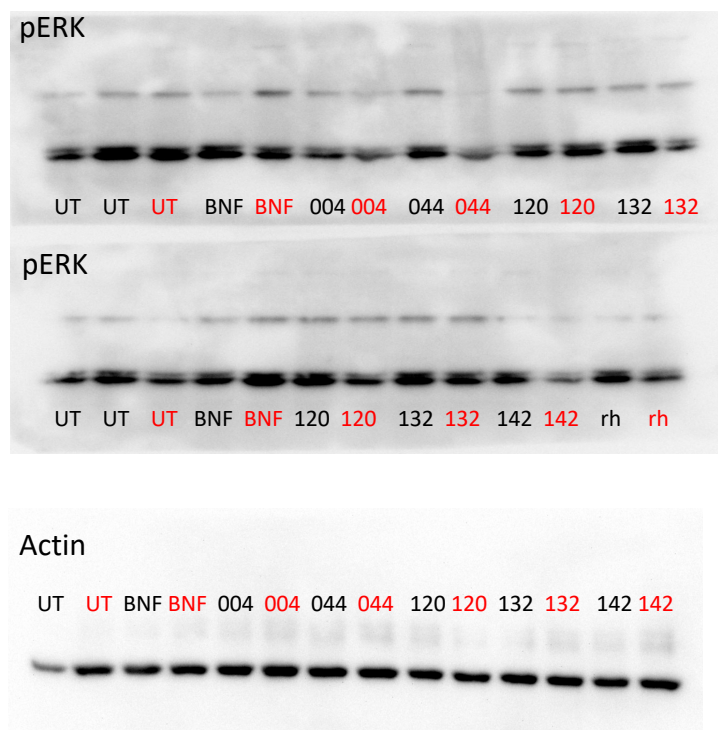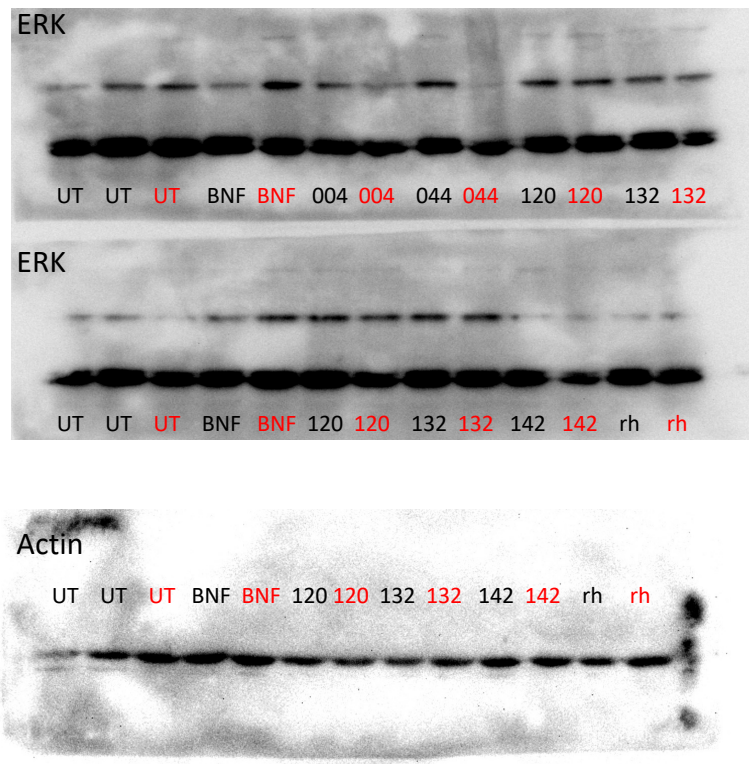

Black font= scramble cell// Red font= IL-6R knock down (KD) cell

# Fig 4C: Scramble MDA-MB-231 cell after treating with CAF-CM and specific inhibitors to detect PD-L1 expression

## STAT3 inhibitor

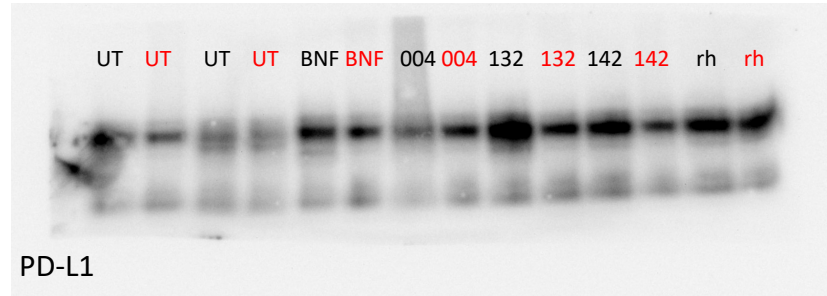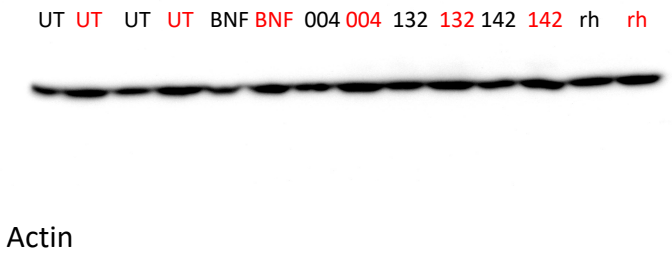

## AKT inhibitor

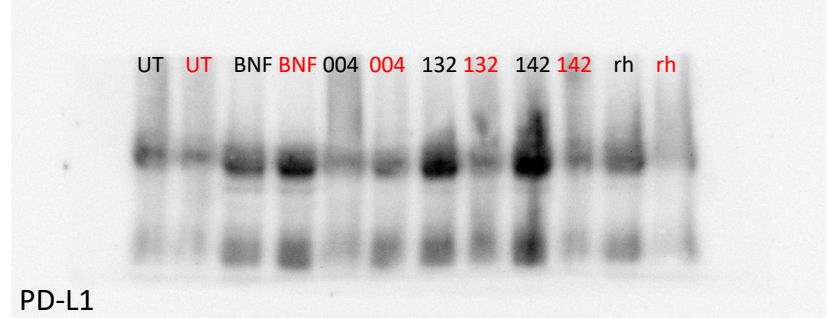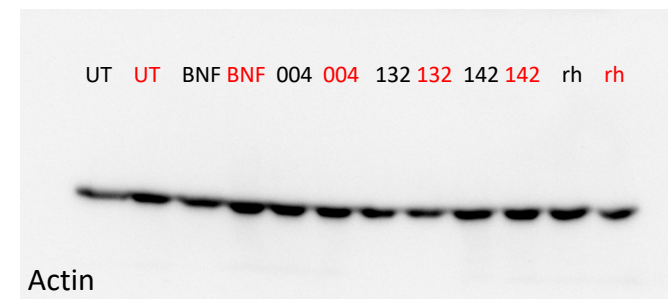

Black font= without inhibitor// Red font= with inhibitor



# Fig 4D: Scramble HCC70 cell after treating with CAF-CM and specific inhibitors to detect PD-L1 expression

## STAT3 inhibitor

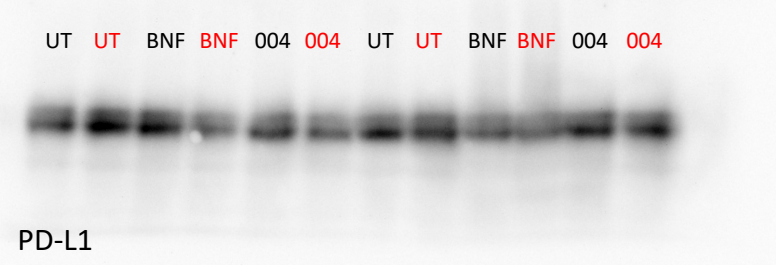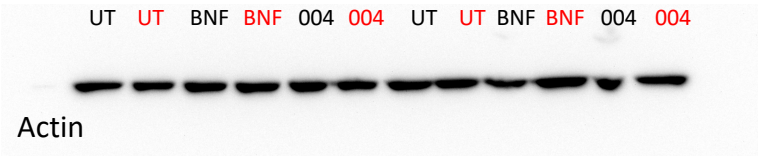

## STAT3 inhibitor

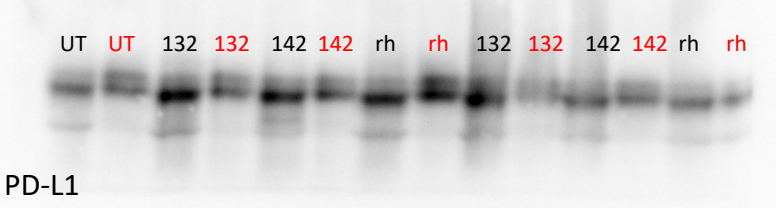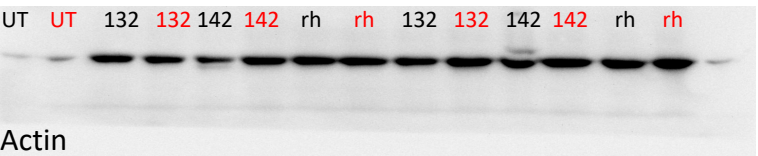

## AKT inhibitor

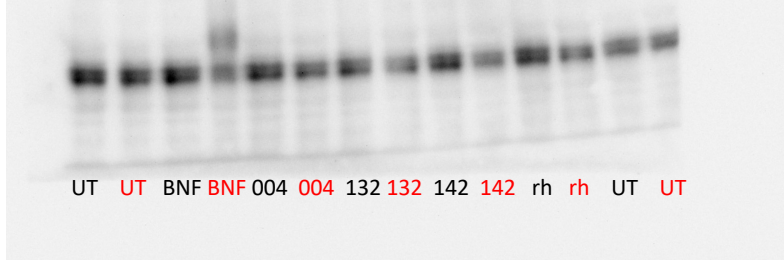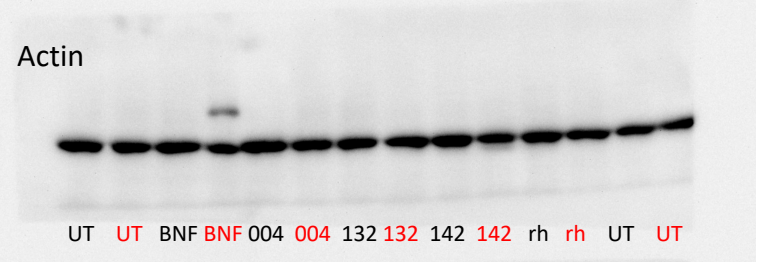

Black font= without inhibitor// Red font= with inhibitor
